# Supplementary material
Source: PubMed Central journal article supplement (PMC4716804)
Supplement: NIHMS748368-supplement-supplemental_table_1.pdf [file NIHMS748368-supplement-supplemental_table_1.pdf]

**Supplementary Table 1. Cognitive Function Test Scores by Treatment Assignment**

| Variable                               | Baseline          | Follow-up         | Change            | P-value |
|----------------------------------------|-------------------|-------------------|-------------------|---------|
| <b>Visual Spatial Tests</b>            |                   |                   |                   |         |
| Route Learning Test (immediate recall) |                   |                   |                   |         |
| Placebo                                | 0.38 ± 0.17 (7)   | 0.41 ± 0.13 (7)   | 0.03 ± 0.23 (7)   | Ref     |
| 3 mg                                   | 0.42 ± 0.07 (7)   | 0.50 ± 0.12 (7)   | 0.08 ± 0.15 (7)   | 0.31    |
| 6.25 mg                                | 0.56 ± 0.08 (8)   | 0.58 ± 0.18 (8)   | 0.01 ± 0.15 (8)   | 0.19    |
| 12.5 mg                                | 0.403 ± 0.134 (7) | 0.410 ± 0.172 (7) | 0.006 ± 0.119 (7) | 0.80    |
| 25 mg                                  | 0.33 ± 0.16 (9)   | 0.43 ± 0.20 (9)   | 0.10 ± 0.23 (9)   | 0.70    |
| Route Learning Test (delayed recall)   |                   |                   |                   |         |
| Placebo                                | 0.39 ± 0.15 (7)   | 0.47 ± 0.22 (7)   | 0.08 ± 0.28 (7)   | Ref     |
| 3 mg                                   | 0.50 ± 0.10 (7)   | 0.47 ± 0.17 (7)   | -0.04 ± 0.23 (7)  | 0.96    |
| 6.25 mg                                | 0.53 ± 0.18 (8)   | 0.67 ± 0.14 (8)   | 0.14 ± 0.22 (8)   | 0.15    |
| 12.5 mg                                | 0.52 ± 0.18 (7)   | 0.49 ± 0.16 (7)   | -0.04 ± 0.17 (7)  | 0.73    |
| 25 mg                                  | 0.39 ± 0.21 (9)   | 0.41 ± 0.23 (9)   | 0.03 ± 0.23 (9)   | 0.85    |
| Complex Figure (immediate recall)      |                   |                   |                   |         |
| Placebo                                | 0.73 ± 0.11 (8)   | 0.69 ± 0.13 (8)   | -0.04 ± 0.12 (8)  | Ref     |
| 3 mg                                   | 0.62 ± 0.12 (8)   | 0.68 ± 0.15 (8)   | 0.07 ± 0.14 (8)   | 0.23    |
| 6.25 mg                                | 0.61 ± 0.16 (9)   | 0.71 ± 0.11 (9)   | 0.10 ± 0.13 (9)   | 0.10    |
| 12.5 mg                                | 0.60 ± 0.10 (10)  | 0.66 ± 0.12 (10)  | 0.06 ± 0.11 (10)  | 0.16    |
| 25 mg                                  | 0.58 ± 0.23 (8)   | 0.66 ± 0.23 (8)   | 0.08 ± 0.09 (8)   | 0.08    |

**Supplementary Table 1. Cognitive Function Test Scores by Treatment Assignment**

| <b>Variable</b>                    | <b>Baseline</b>   | <b>Follow-up</b>  | <b>Change</b>     | <b>P-value</b> |
|------------------------------------|-------------------|-------------------|-------------------|----------------|
| Complex Figure (delayed recall)    |                   |                   |                   |                |
| Placebo                            | 0.63 ± 0.10 (8)   | 0.66 ± 0.17 (8)   | 0.04 ± 0.18 (8)   | Ref            |
| 3 mg                               | 0.58 ± 0.16 (8)   | 0.63 ± 0.20 (8)   | 0.05 ± 0.13 (8)   | 0.59           |
| 6.25 mg                            | 0.56 ± 0.13 (9)   | 0.67 ± 0.14 (9)   | 0.11 ± 0.09 (9)   | 0.51           |
| 12.5 mg                            | 0.56 ± 0.12 (10)  | 0.66 ± 0.15 (10)  | 0.10 ± 0.13 (10)  | 0.31           |
| 25 mg                              | 0.45 ± 0.30 (8)   | 0.62 ± 0.24 (8)   | 0.17 ± 0.18 (8)   | 0.20           |
| <b>Verbal Memory Tests</b>         |                   |                   |                   |                |
| Paragraph (immediate recall)       |                   |                   |                   |                |
| Placebo                            | 0.520 ± 0.200 (8) | 0.521 ± 0.142 (8) | 0.001 ± 0.100 (8) | Ref            |
| 3 mg                               | 0.39 ± 0.12 (8)   | 0.41 ± 0.11 (8)   | 0.03 ± 0.07 (8)   | 0.99           |
| 6.25 mg                            | 0.36 ± 0.19 (9)   | 0.43 ± 0.15 (9)   | 0.07 ± 0.08 (9)   | 0.68           |
| 12.5 mg                            | 0.31 ± 0.12 (10)  | 0.39 ± 0.11 (10)  | 0.08 ± 0.08 (10)  | 0.75           |
| 25 mg                              | 0.40 ± 0.18 (9)   | 0.44 ± 0.24 (9)   | 0.04 ± 0.15 (9)   | 0.81           |
| Paragraph (delayed recall)         |                   |                   |                   |                |
| Placebo                            | 0.42 ± 0.19 (8)   | 0.49 ± 0.11 (8)   | 0.07 ± 0.10 (8)   | Ref            |
| 3 mg                               | 0.26 ± 0.11 (8)   | 0.34 ± 0.12 (8)   | 0.08 ± 0.08 (8)   | 0.65           |
| 6.25 mg                            | 0.28 ± 0.19 (9)   | 0.39 ± 0.19 (9)   | 0.10 ± 0.09 (9)   | 0.39           |
| 12.5 mg                            | 0.27 ± 0.16 (10)  | 0.32 ± 0.13 (10)  | 0.05 ± 0.16 (10)  | 0.15           |
| 25 mg                              | 0.31 ± 0.18 (9)   | 0.39 ± 0.23 (9)   | 0.09 ± 0.12 (9)   | 0.94           |
| Buschke (immediate: Total Correct) |                   |                   |                   |                |
| Placebo                            | 0.79 ± 0.06 (8)   | 0.86 ± 0.10 (8)   | 0.08 ± 0.10 (8)   | Ref            |

**Supplementary Table 1. Cognitive Function Test Scores by Treatment Assignment**

| <b>Variable</b>                         | <b>Baseline</b>   | <b>Follow-up</b>  | <b>Change</b>      | <b>P-value</b> |
|-----------------------------------------|-------------------|-------------------|--------------------|----------------|
| 3 mg                                    | 0.64 ± 0.11 (9)   | 0.79 ± 0.10 (9)   | 0.16 ± 0.10 (9)    | 0.40           |
| 6.25 mg                                 | 0.66 ± 0.19 (9)   | 0.73 ± 0.17 (9)   | 0.07 ± 0.13 (9)    | 0.11           |
| 12.5 mg                                 | 0.66 ± 0.14 (10)  | 0.83 ± 0.10 (10)  | 0.17 ± 0.13 (10)   | 0.58           |
| 25 mg                                   | 0.74 ± 0.16 (9)   | 0.79 ± 0.17 (9)   | 0.06 ± 0.04 (9)    | 0.93           |
| <b>Buschke (delayed: Total Correct)</b> |                   |                   |                    |                |
| Placebo                                 | 0.89 ± 0.09 (7)   | 0.95 ± 0.07 (7)   | 0.06 ± 0.09 (7)    | Ref            |
| 3 mg                                    | 0.66 ± 0.30 (9)   | 0.81 ± 0.18 (9)   | 0.16 ± 0.26 (9)    | 0.84           |
| 6.25 mg                                 | 0.73 ± 0.25 (9)   | 0.84 ± 0.18 (9)   | 0.11 ± 0.17 (9)    | 0.75           |
| 12.5 mg                                 | 0.71 ± 0.18 (10)  | 0.89 ± 0.10 (10)  | 0.18 ± 0.19 (10)   | 0.89           |
| 25 mg                                   | 0.759 ± 0.234 (9) | 0.750 ± 0.289 (9) | -0.009 ± 0.114 (9) | 0.32           |
| <b>Verbal Fluency Tests</b>             |                   |                   |                    |                |
| <b>Verbal Fluency (I)</b>               |                   |                   |                    |                |
| Placebo                                 | 8.6 ± 3.5 (8)     | 10.0 ± 6.6 (8)    | 1.4 ± 6.1 (8)      | Ref            |
| 3 mg                                    | 6.63 ± 4.03 (8)   | 6.63 ± 2.97 (8)   | 0.00 ± 2.56 (8)    | 0.65           |
| 6.25 mg                                 | 7.8 ± 3.1 (9)     | 9.4 ± 4.3 (9)     | 1.7 ± 3.5 (9)      | 0.69           |
| 12.5 mg                                 | 5.60 ± 3.84 (10)  | 6.00 ± 3.30 (10)  | 0.40 ± 2.76 (10)   | 0.92           |
| 25 mg                                   | 10.89 ± 5.13 (9)  | 11.11 ± 4.34 (9)  | 0.22 ± 2.82 (9)    | 0.98           |
| <b>Verbal Fluency (K)</b>               |                   |                   |                    |                |
| Placebo                                 | 5.9 ± 2.0 (8)     | 8.0 ± 5.2 (8)     | 2.1 ± 5.1 (8)      | Ref            |
| 3 mg                                    | 4.88 ± 3.09 (8)   | 4.63 ± 1.77 (8)   | -0.25 ± 2.25 (8)   | 0.12           |
| 6.25 mg                                 | 5.78 ± 3.07 (9)   | 6.11 ± 2.85 (9)   | 0.33 ± 3.67 (9)    | 0.45           |

**Supplementary Table 1. Cognitive Function Test Scores by Treatment Assignment**

| <b>Variable</b>                               | <b>Baseline</b>   | <b>Follow-up</b>  | <b>Change</b>    | <b>P-value</b> |
|-----------------------------------------------|-------------------|-------------------|------------------|----------------|
| 12.5 mg                                       | 5.30 ± 2.67 (10)  | 5.50 ± 2.88 (10)  | 0.20 ± 3.88 (10) | 0.89           |
| 25 mg                                         | 6.8 ± 3.2 (9)     | 5.1 ± 2.4 (9)     | -1.7 ± 3.0 (9)   | 0.13           |
| <b>Verbal Fluency (P)</b>                     |                   |                   |                  |                |
| Placebo                                       | 13.4 ± 2.7 (8)    | 15.5 ± 2.1 (8)    | 2.1 ± 2.7 (8)    | Ref            |
| 3 mg                                          | 13.13 ± 6.15 (8)  | 13.00 ± 5.76 (8)  | -0.13 ± 1.55 (8) | 0.51           |
| 6.25 mg                                       | 13.1 ± 6.4 (9)    | 14.7 ± 7.0 (9)    | 1.6 ± 5.1 (9)    | 0.99           |
| 12.5 mg                                       | 11.50 ± 5.06 (10) | 11.80 ± 5.03 (10) | 0.30 ± 3.65 (10) | 0.26           |
| 25 mg                                         | 15.9 ± 4.6 (9)    | 14.1 ± 4.8 (9)    | -1.8 ± 4.2 (9)   | 0.33           |
| <b>Categorical Fluency</b>                    |                   |                   |                  |                |
| Placebo                                       | 20.88 ± 5.51 (8)  | 21.88 ± 7.92 (8)  | 1.00 ± 8.42 (8)  | Ref            |
| 3 mg                                          | 17.8 ± 6.7 (8)    | 20.5 ± 5.1 (8)    | 2.8 ± 2.4 (8)    | 0.60           |
| 6.25 mg                                       | 15.4 ± 5.7 (9)    | 16.7 ± 6.3 (9)    | 1.2 ± 3.6 (9)    | 0.99           |
| 12.5 mg                                       | 17.7 ± 4.9 (10)   | 19.1 ± 3.4 (10)   | 1.4 ± 3.8 (10)   | 0.89           |
| 25 mg                                         | 20.8 ± 6.4 (9)    | 18.9 ± 4.8 (9)    | -1.9 ± 4.6 (9)   | 0.40           |
| <b>Attention and Executive Function Tests</b> |                   |                   |                  |                |
| <b>VSLT I (immediate)</b>                     |                   |                   |                  |                |
| Placebo                                       | 4.0 ± 1.6 (8)     | 5.2 ± 1.9 (8)     | 1.2 ± 1.3 (8)    | Ref            |
| 3 mg                                          | 2.6 ± 1.1 (9)     | 4.5 ± 2.1 (9)     | 1.9 ± 1.5 (9)    | 0.21           |
| 6.25 mg                                       | 3.78 ± 1.83 (9)   | 4.38 ± 1.38 (9)   | 0.60 ± 1.37 (9)  | 0.35           |
| 12.5 mg                                       | 3.2 ± 1.7 (10)    | 4.9 ± 2.1 (10)    | 1.6 ± 1.8 (10)   | 0.35           |
| 25 mg                                         | 3.84 ± 2.58 (9)   | 4.67 ± 2.22 (9)   | 0.82 ± 1.11 (9)  | 0.69           |

**Supplementary Table 1. Cognitive Function Test Scores by Treatment Assignment**

| <b>Variable</b>          | <b>Baseline</b>  | <b>Follow-up</b> | <b>Change</b>     | <b>P-value</b> |
|--------------------------|------------------|------------------|-------------------|----------------|
| VSLT II (delayed)        |                  |                  |                   |                |
| Placebo                  | 4.5 ± 2.5 (8)    | 6.0 ± 1.8 (8)    | 1.5 ± 2.4 (8)     | Ref            |
| 3 mg                     | 4.33 ± 2.06 (9)  | 4.44 ± 1.88 (9)  | 0.11 ± 1.69 (9)   | 0.08           |
| 6.25 mg                  | 5.22 ± 2.17 (9)  | 5.78 ± 1.09 (9)  | 0.56 ± 1.33 (9)   | 0.34           |
| 12.5 mg                  | 4.30 ± 2.11 (10) | 5.30 ± 1.89 (10) | 1.00 ± 1.76 (10)  | 0.96           |
| 25 mg                    | 4.33 ± 2.83 (9)  | 5.11 ± 2.47 (9)  | 0.78 ± 1.09 (9)   | 0.39           |
| Letter-Number Sequencing |                  |                  |                   |                |
| Placebo                  | 0.45 ± 0.14 (8)  | 0.51 ± 0.12 (8)  | 0.06 ± 0.10 (8)   | Ref            |
| 3 mg                     | 0.39 ± 0.15 (8)  | 0.42 ± 0.15 (8)  | 0.03 ± 0.16 (8)   | 0.17           |
| 6.25 mg                  | 0.47 ± 0.09 (9)  | 0.47 ± 0.11 (9)  | 0.00 ± 0.06 (9)   | 0.45           |
| 12.5 mg                  | 0.44 ± 0.08 (10) | 0.41 ± 0.06 (10) | -0.03 ± 0.09 (10) | 0.02           |
| 25 mg                    | 0.43 ± 0.20 (9)  | 0.48 ± 0.14 (9)  | 0.05 ± 0.11 (9)   | 0.44           |
| Stroop Interference Test |                  |                  |                   |                |
| Placebo                  | 59.1 ± 19.7 (8)  | 49.8 ± 10.2 (8)  | -9.4 ± 11.1 (8)   | Ref            |
| 3 mg                     | 64.3 ± 17.9 (9)  | 55.0 ± 14.3 (9)  | -9.3 ± 14.3 (9)   | 0.92           |
| 6.25 mg                  | 54.9 ± 9.1 (10)  | 53.4 ± 8.7 (10)  | -1.5 ± 7.6 (10)   | 0.61           |
| 12.5 mg                  | 52.8 ± 5.0 (10)  | 46.8 ± 11.7 (10) | -6.0 ± 10.1 (10)  | 0.87           |
| 25 mg                    | 57.4 ± 21.6 (9)  | 53.2 ± 19.7 (9)  | -4.2 ± 11.9 (9)   | 0.60           |
| Trails B                 |                  |                  |                   |                |
| Placebo                  | 107.7 ± 62.8 (7) | 103.7 ± 53.1 (7) | -4.0 ± 53.4 (7)   | Ref            |
| 3 mg                     | 141 ± 86 (8)     | 130 ± 90 (8)     | -11 ± 38 (8)      | 0.71           |

**Supplementary Table 1. Cognitive Function Test Scores by Treatment Assignment**

| Variable | Baseline         | Follow-up        | Change         | P-value |
|----------|------------------|------------------|----------------|---------|
| 6.25 mg  | 118 ± 42 (7)     | 101 ± 38 (7)     | -17 ± 39 (7)   | 0.46    |
| 12.5 mg  | 102 ± 48 (10)    | 87 ± 53 (10)     | -15 ± 49 (10)  | 0.08    |
| 25 mg    | 107.5 ± 86.9 (8) | 108.8 ± 81.4 (8) | 1.3 ± 40.6 (8) | 0.89    |
| Mazes    |                  |                  |                |         |
| Placebo  | 102 ± 23 (6)     | 125 ± 77 (6)     | 23 ± 63 (6)    | Ref     |
| 3 mg     | 184 ± 134 (8)    | 153 ± 102 (8)    | -32 ± 108 (8)  | 0.23    |
| 6.25 mg  | 177 ± 88 (9)     | 163 ± 88 (9)     | -15 ± 85 (9)   | 0.67    |
| 12.5 mg  | 131 ± 98 (10)    | 104 ± 50 (10)    | -27 ± 64 (10)  | 0.20    |
| 25 mg    | 144 ± 75 (9)     | 108 ± 78 (9)     | -36 ± 91 (9)   | 0.25    |

Data represent mean ± SD (N) for baseline, follow-up and change in cognitive function scores. P-value displayed is for the ANCOVA model predicting change in cognitive scores by testosterone dose group compared to placebo adjusted for baseline scores, age and education.

Route Learning score reflects baseline score out of 16 possible correct items

Complex Figure score reflects baseline score out of 9 possible correct items

Paragraph Recall score reflects baseline score out of 44 possible correct items

Buschke immediate and delay scores reflects baseline score out of 60 and 12 possible correct items, respectively

Letter-Number Sequencing score reflects baseline score out of 21 possible correct items
