# Supplementary material
Source: PubMed Central journal article supplement (PMC4716804)
Supplement: NIHMS748368-supplement-supplemental_table_2.pdf [file NIHMS748368-supplement-supplemental_table_2.pdf]

**Supplementary Table 2. Linear model for association between change in cognitive function and change in serum testosterone levels**

| <b>Cognitive Domain</b>                   | <b>β (95% CI)</b>      | <b>p-value</b> |
|-------------------------------------------|------------------------|----------------|
| <b>Visual Spatial Tests</b>               |                        |                |
| Route Learning Test<br>(immediate recall) |                        |                |
| Δ Total Testosterone, 100 ng/dl           | 0.004 (-0.066, 0.074)  | 0.91           |
| Δ Free Testosterone, 10 pg/ml             | -0.009 (-0.378, 0.361) | 0.96           |
| Route Learning Test<br>(delayed recall)   |                        |                |
| Δ Total Testosterone, 100 ng/dl           | -0.007 (-0.086, 0.073) | 0.87           |
| Δ Free Testosterone, 10 pg/ml             | -0.001 (-0.422, 0.420) | >0.99          |
| Complex Figure<br>(immediate recall)      |                        |                |
| Δ Total Testosterone, 100 ng/dl           | 0.03 (-0.01, 0.06)     | 0.16           |
| Δ Free Testosterone, 10 pg/ml             | 0.12 (-0.08, 0.32)     | 0.24           |
| Complex Figure<br>(delayed recall)        |                        |                |
| Δ Total Testosterone, 100 ng/dl           | 0.02 (-0.03, 0.06)     | 0.47           |
| Δ Free Testosterone, 10 pg/ml             | 0.12 (-0.13, 0.37)     | 0.34           |
| <b>Verbal Memory Tests</b>                |                        |                |
| Paragraph<br>(immediate recall)           |                        |                |
| Δ Total Testosterone, 100 ng/dl           | 0.010 (-0.023, 0.042)  | 0.55           |
| Δ Free Testosterone, 10 pg/ml             | 0.05 (-0.12, 0.23)     | 0.54           |
| Paragraph<br>(delayed recall)             |                        |                |
| Δ Total Testosterone, 100 ng/dl           | -0.002 (-0.039, 0.036) | 0.93           |
| Δ Free Testosterone, 10 pg/ml             | -0.002 (-0.205, 0.201) | 0.98           |
| Buschke<br>(immediate: Total Correct)     |                        |                |
| Δ Total Testosterone, 100 ng/dl           | -0.02 (-0.05, 0.01)    | 0.29           |
| Δ Free Testosterone, 10 pg/ml             | -0.06 (-0.22, 0.11)    | 0.48           |
| Buschke<br>(delayed: Total Correct-Free)  |                        |                |
| Δ Total Testosterone, 100 ng/dl           | -0.01 (-0.05, 0.03)    | 0.52           |

|                                               |                        |      |
|-----------------------------------------------|------------------------|------|
| Δ Free Testosterone, 10 pg/ml                 | -0.07 (-0.29, 0.15)    | 0.53 |
| <b>Verbal Ability/Language Tests</b>          |                        |      |
| Verbal Fluency (I)                            |                        |      |
| Δ Total Testosterone, 100 ng/dl               | 0.006 (-1.176, 1.187)  | 0.99 |
| Δ Free Testosterone, 10 pg/ml                 | -0.88 (-7.28, 5.53)    | 0.78 |
| Verbal Fluency (K)                            |                        |      |
| Δ Total Testosterone, 100 ng/dl               | -0.82 (-1.90, 0.26)    | 0.13 |
| Δ Free Testosterone, 10 pg/ml                 | -4.7 (-10.5, 1.1)      | 0.11 |
| Verbal Fluency (P)                            |                        |      |
| Δ Total Testosterone, 100 ng/dl               | -1.05 (-2.37, 0.28)    | 0.12 |
| Δ Free Testosterone, 10 pg/ml                 | -4.0 (-11.3, 3.3)      | 0.27 |
| Categorical Fluency                           |                        |      |
| Δ Total Testosterone, 100 ng/dl               | -0.37 (-2.01, 1.28)    | 0.65 |
| Δ Free Testosterone, 10 pg/ml                 | -3.6 (-12.6, 5.4)      | 0.42 |
| <b>Attention and Executive Function Tests</b> |                        |      |
| VSLT I<br>(immediate)                         |                        |      |
| Δ Total Testosterone, 100 ng/dl               | 0.08 (-0.40, 0.56)     | 0.73 |
| Δ Free Testosterone, 10 pg/ml                 | 0.59 (-2.00, 3.19)     | 0.64 |
| VSLT II<br>(delayed)                          |                        |      |
| Δ Total Testosterone, 100 ng/dl               | 0.01 (-0.50, 0.52)     | 0.96 |
| Δ Free Testosterone, 10 pg/ml                 | 0.15 (-2.61, 2.91)     | 0.91 |
| Letter-Number Sequencing                      |                        |      |
| Δ Total Testosterone, 100 ng/dl               | -0.009 (-0.039, 0.020) | 0.53 |
| Δ Free Testosterone, 10 pg/ml                 | -0.04 (-0.20, 0.12)    | 0.61 |
| Stroop Interference Test                      |                        |      |
| Δ Total Testosterone, 100 ng/dl               | -1.1 (-3.6, 1.5)       | 0.39 |
| Δ Free Testosterone, 10 pg/ml                 | -6.1 (-20.0, 7.7)      | 0.37 |
| Trails B                                      |                        |      |
| Δ Total Testosterone, 100 ng/dl               | 0.58 (-11.25, 12.41)   | 0.92 |
| Δ Free Testosterone, 10 pg/ml                 | 0.10 (-63.07, 63.26)   | 0.99 |

Mazes

|                                        |                    |      |
|----------------------------------------|--------------------|------|
| $\Delta$ Total Testosterone, 100 ng/dl | -16.1 (-38.8, 6.5) | 0.16 |
| $\Delta$ Free Testosterone, 10 pg/ml   | -102 (-219, 14)    | 0.08 |

---

VSLT= Visual Spatial Learning Test;  $\beta$  coefficients represent change in cognitive scores as a function of 100 ng/dl change in total and 10 pg/ml change in free testosterone levels, respectively. Linear models are adjusted for baseline scores, age and education
